# Supplementary material for: A 2D approach to surface-tension-confined fluidics on parylene C
Source: Royal Society of Chemistry journal article supplement (doi:10.1039/c7ra01604b), 2017-01-01
Supplement: c7ra01604b1.pdf [file c7ra01604b1.pdf]

## Electronic Supplementary Information

### A 2D Approach to Surface-Tension-Confined Fluidics on Parylene C

P. Calcagnile<sup>a†</sup>, T. Dattoma<sup>a</sup>, E. Scarpa<sup>a</sup>, Antonio Quattieri<sup>a</sup>, Laura Blasi<sup>b</sup>, Massimo De Vittorio<sup>a,c</sup> and Francesco Rizzi<sup>a†</sup>

In this file the videos related to the photographs in Fig.4 are provided.

V1: A water drop is gently lied onto the first reservoir, spreading towards the second one, confined in the channel and driven only by differences in surface energy onto the substrate. Video related to Fig.4(a-c).

V2: Superhydrophilic and superhydrophobic character of the surface inside and outside the channel. Video related to Fig.4d.

V3: While rotating the substrate of about 90° water stays confined into the channel. Video related to Fig.4(e-f).

V4: demonstration of the efficiency of the fabricated bidimensional Surface-Tension-Confined channel.

---

<sup>a</sup> Center for Biomolecular Nanotechnologies (CBN) @UNILE, Istituto Italiano di Tecnologia (IIT) Via Barsanti, 73010 Arnesano (LE), Italy.

<sup>b</sup> Nanotechnology Institute (CNR-NANOTEC), Via Monteroni, 73100, Lecce, Italy.

<sup>c</sup> Dipartimento di Ingegneria dell'Innovazione – Università del Salento via per Arnesano, 73100 Lecce, Italy.

† Corresponding Authors:

Email: [paola.calcagnile@ic.cnr.it](mailto:paola.calcagnile@ic.cnr.it), [francesco.rizzi@iit.it](mailto:francesco.rizzi@iit.it)
